# Supplementary material
Source: publisher figshare collection journal article supplement (https://gsajournals.figshare.com/articles/dataset/_/14331020)
Supplement: Supplementary file 1 [file 1]

## Sheet: Sheet1
codon	Amino Acid	ana_ave	ari_ave	bia_ave	bip_ave	bus_ave	ele_ave	ere_ave	eug_ave	fic_ave	gri_ave	hyd_ave	kik_ave	mel_ave	mir_ave	moj_ave	nav_ave	nov_ave	obs_ave	per_ave	pse_ave	rho_ave	sec_ave	ser_ave	sim_ave	suz_ave	tak_ave	vir_ave	wil_ave	yak_ave
gca	Ala	0.535272	0.84163	0.396764	0.538394	0.923483	0.452534	0.556842	0.669716	0.541529	0.90456	0.946491	0.450004	0.580014	0.582954	0.838009	0.838622	0.779125	0.597064	0.585256	0.582469	0.499265	0.547795	0.518377	0.54301	0.460833	0.37134	0.790827	0.835399	0.561765
gcc	Ala	2.03745	1.53965	2.28147	2.03158	1.24377	2.21639	2.00396	1.82065	1.97692	1.54208	1.3784	2.17593	1.98517	2.09187	1.53956	1.52604	1.63991	2.06898	2.09444	2.0911	2.11084	2.00538	2.03474	2.01095	2.20885	2.28519	1.6316	1.6969	2.00843
gcg	Ala	0.628335	0.827679	0.78454	0.601195	0.852651	0.758648	0.790565	0.585578	0.757026	0.832549	0.769492	0.72845	0.762768	0.701766	0.829635	0.846977	0.937661	0.735324	0.691091	0.691922	0.742452	0.783774	0.699367	0.795659	0.707161	0.80914	0.925447	0.389177	0.775047
gct	Ala	0.798946	0.791037	0.537225	0.828833	0.980099	0.57243	0.648638	0.924057	0.72452	0.720809	0.905616	0.645618	0.67205	0.62341	0.792792	0.794356	0.643302	0.598632	0.629209	0.634505	0.647447	0.663049	0.747512	0.650385	0.617154	0.534328	0.652131	1.08343	0.654761
aga	Arg	0.447346	0.389423	0.347873	0.481256	0.425177	0.379419	0.422712	0.592764	0.482895	0.357878	0.398344	0.335606	0.454801	0.372724	0.368632	0.393621	0.33358	0.358813	0.368544	0.37289	0.428766	0.441119	0.363249	0.434587	0.404902	0.345343	0.333772	0.626101	0.434542
agg	Arg	0.653335	0.327242	0.77149	0.660926	0.214962	0.67305	0.692779	0.69752	0.698457	0.316537	0.304243	0.638872	0.632628	0.478375	0.334273	0.34419	0.293559	0.467385	0.480197	0.488877	0.691867	0.664594	0.643179	0.662579	0.755995	0.723937	0.288935	0.372378	0.66021
cga	Arg	0.864049	0.79332	0.657166	0.894246	0.542854	0.780402	0.81895	0.990464	0.884217	0.773929	0.840115	0.686639	0.874211	0.663736	0.799883	0.772548	0.600545	0.636739	0.677248	0.680134	0.82279	0.852154	0.771863	0.840552	0.773982	0.696124	0.604355	0.916717	0.874333
cgc	Arg	1.95364	2.5173	2.41687	1.94187	2.696	2.25785	2.22485	1.71927	2.06291	2.40374	2.34841	2.34565	2.17856	2.44905	2.50987	2.50089	2.79006	2.57321	2.44387	2.42242	2.11224	2.20887	2.10158	2.23424	2.12411	2.40746	2.75755	1.51721	2.19848
cgg	Arg	1.15322	0.641782	1.17238	1.05151	0.323789	1.12973	1.01203	0.858277	1.02928	0.633752	0.521378	1.13084	0.957364	0.961365	0.640373	0.651017	0.62848	0.913464	0.970301	0.966991	1.12024	0.974387	1.06479	0.971032	1.12177	1.15232	0.640524	0.588878	0.969339
cgt	Arg	0.928409	1.33094	0.634222	0.970199	1.79722	0.779545	0.828685	1.14171	0.842245	1.51417	1.58751	0.862388	0.902432	1.07475	1.34697	1.3648	1.35378	1.05039	1.05984	1.06869	0.824093	0.858878	1.05533	0.857006	0.810244	0.674811	1.37487	2.00643	0.863102
aac	Asn	1.2603	0.910381	1.37699	1.26153	0.804883	1.22251	1.21248	1.05001	1.26926	0.809268	0.85422	1.21128	1.17992	1.17847	0.904538	0.913456	0.905592	1.14774	1.17871	1.17806	1.19701	1.21084	1.13878	1.21194	1.24918	1.21684	0.89739	0.582985	1.2188
aat	Asn	0.739705	1.08962	0.623011	0.738467	1.19512	0.777494	0.787523	0.949994	0.730738	1.19073	1.14578	0.788725	0.820083	0.821528	1.09546	1.08654	1.09441	0.852259	0.821288	0.821944	0.802987	0.789155	0.861223	0.788055	0.747808	0.78316	1.10261	1.41701	0.781197
gac	Asp	1.07639	0.871168	1.20326	1.05495	0.71289	1.05979	1.03628	0.865489	1.04798	0.684835	0.786488	1.078	0.9973	1.0814	0.864024	0.876891	0.833859	1.0595	1.0816	1.08078	1.02608	1.0241	1.00869	1.02617	1.02458	1.03378	0.821768	0.56564	1.02987
gat	Asp	0.92361	1.12883	0.796735	0.945046	1.28711	0.940209	0.963725	1.13451	0.952017	1.31517	1.21351	0.921998	1.0027	0.918601	1.13598	1.12311	1.16614	0.9405	0.918403	0.919221	0.973919	0.975897	0.991313	0.973826	0.972393	0.966224	1.17823	1.43436	0.970126
tgc	Cys	1.42363	1.38849	1.5922	1.41592	1.26161	1.49403	1.49574	1.29471	1.45407	1.29266	1.30002	1.51253	1.48566	1.46437	1.38602	1.39503	1.40489	1.48642	1.47016	1.4645	1.46427	1.50202	1.42351	1.51285	1.48848	1.57077	1.40439	1.05251	1.49504
tgt	Cys	0.576373	0.611511	0.407804	0.58408	0.738393	0.505967	0.504255	0.705286	0.545929	0.707342	0.699981	0.487465	0.514341	0.53563	0.613978	0.604966	0.595108	0.513576	0.529838	0.535502	0.535733	0.497978	0.57649	0.487152	0.508346	0.429229	0.595613	0.947487	0.504964
caa	Gln	0.540445	0.689696	0.386894	0.568342	0.814317	0.458413	0.501587	0.657913	0.547676	0.717836	0.795102	0.422267	0.521971	0.483305	0.696486	0.708411	0.669174	0.460723	0.485967	0.487354	0.508102	0.506943	0.483482	0.497903	0.47474	0.393672	0.68163	1.02715	0.508152
cag	Gln	1.45956	1.3103	1.61311	1.43166	1.18568	1.54159	1.49841	1.34209	1.45232	1.28216	1.2049	1.57773	1.47803	1.5167	1.30351	1.29159	1.33083	1.53928	1.51403	1.51265	1.4919	1.49306	1.51652	1.5021	1.52226	1.60633	1.31837	0.972851	1.49185
gaa	Glu	0.61939	0.655467	0.399894	0.646407	0.702358	0.513777	0.547937	0.736294	0.618138	0.649456	0.761633	0.437872	0.568003	0.509409	0.654235	0.65309	0.623525	0.471328	0.504896	0.508676	0.566611	0.545642	0.518445	0.541489	0.503272	0.455916	0.628262	0.951004	0.550432
gag	Glu	1.38061	1.34453	1.60011	1.35359	1.29764	1.48622	1.45206	1.26371	1.38186	1.35054	1.23837	1.56213	1.432	1.49059	1.34577	1.34691	1.37647	1.52867	1.4951	1.49132	1.43339	1.45436	1.48155	1.45851	1.49372	1.54408	1.37174	1.049	1.44957
gga	Gly	1.15936	0.615594	0.891474	1.16913	0.682853	1.00321	1.06522	1.25338	1.19098	0.592642	0.667759	0.857348	1.0539	0.823657	0.619826	0.632981	0.505384	0.743633	0.83898	0.840037	1.10445	1.05705	0.939911	1.04125	1.0668	0.990881	0.514306	1.01782	1.04172
ggc	Gly	1.70229	2.37963	2.13195	1.67032	2.22874	1.99877	1.88742	1.50902	1.70464	2.22332	2.23615	2.12854	1.85427	2.08249	2.38601	2.35606	2.50365	2.24395	2.07517	2.08184	1.82316	1.89207	1.89979	1.90746	1.86655	2.07856	2.45602	1.5185	1.92032
ggg	Gly	0.423312	0.255533	0.395004	0.388902	0.181091	0.341725	0.328314	0.325458	0.373944	0.275928	0.244578	0.327753	0.292772	0.450887	0.244915	0.254612	0.251983	0.383767	0.443784	0.438407	0.380926	0.310192	0.346671	0.311871	0.374569	0.349606	0.256724	0.247817	0.30416
ggt	Gly	0.71503	0.749242	0.581572	0.771649	0.907314	0.656287	0.719042	0.912141	0.730432	0.908115	0.851515	0.686355	0.799066	0.642966	0.749251	0.765352	0.73898	0.628651	0.642061	0.639711	0.691471	0.740689	0.813631	0.739419	0.686085	0.580955	0.772947	1.22787	0.733803
cac	His	1.29501	1.03633	1.44327	1.27301	0.821216	1.3074	1.32909	1.10757	1.34461	0.946908	0.906215	1.28673	1.27029	1.24204	1.03567	1.03118	0.998226	1.22368	1.24141	1.23043	1.33475	1.2941	1.21727	1.29147	1.32934	1.35931	0.98739	0.633488	1.3298
cat	His	0.704989	0.963672	0.556734	0.72699	1.17878	0.692602	0.670908	0.892434	0.655389	1.05309	1.09378	0.713273	0.729708	0.75796	0.964327	0.968824	1.00177	0.776324	0.758593	0.769571	0.665247	0.705898	0.782726	0.708533	0.667587	0.640688	1.01261	1.36651	0.670204
ata	Ile	0.512412	0.794548	0.457132	0.527838	1.07323	0.449125	0.504511	0.571284	0.48019	0.691146	0.870058	0.52409	0.523656	0.619477	0.791485	0.808146	0.872622	0.627123	0.60981	0.611512	0.485903	0.517103	0.518308	0.504024	0.474682	0.419506	0.868242	0.861975	0.511382
atc	Ile	1.53264	1.13058	1.8075	1.46637	0.692255	1.69073	1.59734	1.36561	1.59004	1.11507	1.00471	1.58372	1.55854	1.44265	1.12812	1.13409	1.02614	1.4185	1.44198	1.44335	1.64207	1.60374	1.48602	1.61922	1.67791	1.75471	1.01524	0.813081	1.57473
att	Ile	0.954944	1.07487	0.73537	1.00579	1.23452	0.860142	0.898145	1.0631	0.929771	1.19378	1.12523	0.892188	0.917799	0.937876	1.08039	1.06229	1.10124	0.95438	0.94821	0.945139	0.87203	0.87916	0.995675	0.876753	0.842893	0.825786	1.11652	1.32946	0.913889
cta	Leu	0.467762	0.590101	0.300787	0.473713	0.67906	0.343056	0.427491	0.615681	0.421646	0.465478	0.674097	0.409744	0.491697	0.427059	0.587432	0.576821	0.54318	0.36476	0.433125	0.42904	0.425517	0.437018	0.492945	0.425814	0.401257	0.312989	0.543596	0.752234	0.420007
ctc	Leu	1.03164	0.934537	1.1077	0.983253	0.692121	1.02678	0.977594	0.82498	0.980656	1.0172	0.830016	1.06288	0.939659	1.1598	0.941881	0.923923	0.852192	1.11494	1.15807	1.1612	1.00133	0.961556	1.03171	0.974618	1.04903	1.12283	0.84937	0.682875	0.959004
ctg	Leu	2.68679	2.51315	3.42971	2.60843	2.23779	3.1736	2.94133	2.24471	2.67804	2.44292	2.14113	3.14063	2.85291	2.9268	2.51579	2.4996	2.70595	3.15197	2.93214	2.91538	2.91249	2.9554	2.88766	2.98419	3.03237	3.29555	2.67792	1.45269	2.96231
ctt	Leu	0.573023	0.421893	0.338306	0.647062	0.575617	0.367411	0.489476	0.758606	0.60512	0.42457	0.561301	0.412588	0.514596	0.404258	0.424255	0.454727	0.470478	0.348341	0.403241	0.411449	0.484804	0.489493	0.495884	0.473001	0.447165	0.310867	0.479555	0.71414	0.49939
tta	Leu	0.235613	0.382512	0.122192	0.241253	0.476411	0.163025	0.19205	0.396446	0.249174	0.322153	0.4831	0.144961	0.204729	0.17153	0.383165	0.387775	0.317976	0.14158	0.169685	0.17404	0.228756	0.194441	0.19706	0.190357	0.182433	0.146836	0.324654	0.6657	0.199008
ttg	Leu	1.00517	1.15781	0.701309	1.04629	1.339	0.926135	0.972056	1.15957	1.06537	1.32768	1.31035	0.829193	0.996412	0.910549	1.14748	1.17563	1.11022	0.878407	0.903734	0.908891	0.947101	0.962096	0.894736	0.952016	0.878768	0.81093	1.1249	1.74849	0.960284
aaa	Lys	0.573793	0.712532	0.396141	0.593181	0.741489	0.510506	0.491441	0.670315	0.556037	0.755329	0.79731	0.390663	0.521021	0.524064	0.709979	0.715184	0.721922	0.495989	0.520577	0.526373	0.537533	0.509076	0.458065	0.493398	0.474383	0.423821	0.734693	0.998248	0.492828
aag	Lys	1.42621	1.28747	1.60386	1.40682	1.25851	1.48949	1.50856	1.32968	1.44396	1.24467	1.20269	1.60934	1.47898	1.47594	1.29002	1.28482	1.27808	1.50401	1.47942	1.47363	1.46247	1.49092	1.54193	1.5066	1.52262	1.57618	1.26531	1.00175	1.50717
atg	Met	1	1	1	1	1	1	1	1	1	1	1	1	1	1	1	1	1	1	1	1	1	1	1	1	1	1	1	1	1
ttc	Phe	1.31768	1.13622	1.50864	1.25345	0.792677	1.39315	1.35337	1.16868	1.29188	1.03454	1.0055	1.27247	1.33103	1.3038	1.13907	1.13905	0.999679	1.31926	1.30651	1.30234	1.37826	1.36596	1.26098	1.3743	1.38403	1.45164	0.982231	0.925168	1.32938
ttt	Phe	0.682315	0.863782	0.491363	0.746555	1.20732	0.606848	0.646628	0.83132	0.708121	0.965463	0.9945	0.727533	0.668965	0.696195	0.860934	0.860954	1.00032	0.680741	0.693487	0.697663	0.621742	0.634044	0.739017	0.625699	0.612955	0.54836	1.01777	1.07483	0.67062
cca	Pro	0.83402	1.07293	0.57161	0.822911	1.25135	0.657776	0.767047	0.970928	0.760532	1.12009	1.20374	0.61811	0.800939	0.8398	1.08349	1.06797	0.950082	0.867635	0.826972	0.827609	0.699234	0.769682	0.742376	0.765696	0.681619	0.530142	0.965651	1.31741	0.805552
ccc	Pro	1.48958	1.34143	1.86119	1.51247	1.20558	1.719	1.60585	1.38788	1.54703	1.36154	1.21541	1.69364	1.5668	1.63577	1.34203	1.34001	1.39855	1.66603	1.63223	1.63594	1.6442	1.5827	1.55957	1.5938	1.77035	1.83159	1.38187	1.28246	1.60856
ccg	Pro	1.11062	1.10634	1.21918	1.06859	0.873426	1.25476	1.1828	0.957297	1.17839	1.1819	1.01646	1.27343	1.2132	1.09641	1.10169	1.12438	1.25176	1.12179	1.09802	1.10208	1.16264	1.23325	1.21028	1.23174	1.10942	1.29509	1.26803	0.721585	1.15508
cct	Pro	0.56578	0.479298	0.34802	0.596022	0.669642	0.368466	0.444307	0.683899	0.514042	0.336463	0.564392	0.414829	0.419057	0.428015	0.472786	0.479669	0.399604	0.344551	0.442779	0.434377	0.493927	0.414364	0.48778	0.408762	0.432596	0.343173	0.384452	0.690597	0.430805
agc	Ser	1.4968	1.84988	1.7435	1.47296	1.91036	1.59221	1.61693	1.36153	1.49869	1.69413	1.7512	1.76068	1.5538	1.72149	1.83551	1.82632	1.96956	1.78899	1.71687	1.71225	1.52516	1.56868	1.63861	1.5836	1.57342	1.6531	1.95948	1.0981	1.59611
agt	Ser	0.769364	0.698581	0.632456	0.799585	0.819663	0.733173	0.732289	0.915357	0.798646	0.831685	0.792934	0.636663	0.768302	0.646483	0.711374	0.72697	0.643136	0.637971	0.646618	0.652008	0.777006	0.750885	0.727297	0.744729	0.73377	0.669422	0.647007	1.15439	0.737557
tca	Ser	0.432942	0.653385	0.285821	0.450122	0.771991	0.337862	0.400889	0.58439	0.42999	0.657806	0.755483	0.338144	0.430611	0.430358	0.652104	0.643728	0.604619	0.419913	0.431032	0.427504	0.392495	0.419412	0.439119	0.409189	0.367701	0.256504	0.611333	0.93956	0.405643
tcc	Ser	1.66916	1.11031	1.79416	1.6196	0.983072	1.68333	1.69283	1.44276	1.61053	1.10722	1.03074	1.62399	1.624	1.46378	1.11639	1.11258	1.10459	1.43246	1.46313	1.46465	1.65909	1.64831	1.53943	1.65295	1.7544	1.75176	1.12795	1.11904	1.68234
tcg	Ser	1.06286	1.21412	1.237	1.06897	0.936425	1.31474	1.13391	1.00393	1.19796	1.33074	1.1463	1.20876	1.19811	1.27754	1.2153	1.22646	1.27086	1.32119	1.26864	1.28088	1.20287	1.20438	1.14687	1.22248	1.16916	1.38593	1.24841	0.959854	1.16065
tct	Ser	0.568866	0.473729	0.307065	0.588763	0.578491	0.33868	0.423155	0.692033	0.464183	0.378425	0.523343	0.431757	0.425181	0.460352	0.469325	0.486351	0.40724	0.39948	0.473712	0.462713	0.443369	0.408327	0.508672	0.387047	0.392563	0.283292	0.405812	0.750339	0.4177
taa	Stp	1.28443	1.36178	1.03743	1.23503	1.78518	1.12838	1.07335	1.27946	1.21033	1.58757	1.49326	1.13398	1.09311	1.15868	1.36602	1.36937	1.34731	1.13847	1.14746	1.12444	1.2131	1.07335	1.22156	1.08846	1.2041	1.15367	1.34281	1.55639	1.08546
tag	Stp	1.05314	0.91994	1.23054	1.08683	0.776946	1.15766	1.14521	1.08186	1.09356	0.819611	0.835329	1.13174	1.1232	1.11153	0.926647	0.936929	0.988024	1.09805	1.11377	1.1042	1.09789	1.14746	1.09805	1.12444	1.08801	1.11319	1.01048	0.857146	1.13568
tga	Stp	0.662425	0.718278	0.732036	0.678144	0.437874	0.713964	0.781437	0.638681	0.696108	0.592814	0.671407	0.734281	0.783683	0.72979	0.707335	0.698202	0.664671	0.763473	0.738772	0.771364	0.689006	0.779192	0.680389	0.787106	0.703338	0.733133	0.646707	0.590968	0.778861
aca	Thr	0.687304	1.04796	0.448632	0.722021	1.2405	0.533502	0.622878	0.780855	0.62535	1.15272	1.1852	0.595927	0.648131	0.821566	1.04791	1.03226	1.06409	0.831564	0.814005	0.817449	0.590056	0.616815	0.698435	0.611126	0.536762	0.41156	1.08009	1.25439	0.607515
acc	Thr	1.70945	1.14279	1.9494	1.6776	0.976036	1.83678	1.75109	1.53032	1.73193	1.14939	1.0521	1.80458	1.71889	1.54032	1.14728	1.15583	1.22322	1.53179	1.53889	1.53936	1.78722	1.73633	1.68834	1.73248	1.87744	1.94046	1.22802	1.19876	1.761
acg	Thr	0.888239	1.18201	1.14388	0.857617	1.01227	1.11652	1.03944	0.868393	0.977332	1.15326	1.10345	1.08771	1.06049	1.06774	1.19003	1.19457	1.21614	1.12558	1.07772	1.07205	1.03296	1.05422	1.03476	1.07561	1.03436	1.17438	1.20511	0.645867	1.04143
act	Thr	0.715002	0.627238	0.458091	0.74276	0.771194	0.513195	0.586594	0.820433	0.665393	0.544633	0.65925	0.511787	0.572487	0.570376	0.614777	0.627838	0.496551	0.511063	0.56939	0.57114	0.589768	0.592636	0.578461	0.580775	0.545429	0.473609	0.486779	0.912996	0.590057
tgg	Trp	1	1	1	1	1	1	1	1	1	1	1	1	1	1	1	1	1	1	1	1	1	1	1	1	1	1	1	1	1
tac	Tyr	1.33558	1.00767	1.52093	1.31664	0.837952	1.35865	1.37269	1.16967	1.3978	0.888116	0.916423	1.32106	1.32785	1.30803	1.00602	1.01197	0.953353	1.29462	1.30902	1.31386	1.34756	1.36812	1.27294	1.37117	1.37579	1.39573	0.941688	0.661683	1.38032
tat	Tyr	0.664419	0.992328	0.479066	0.683356	1.16205	0.641348	0.627306	0.830332	0.602199	1.11188	1.08358	0.678938	0.672149	0.691972	0.993976	0.988034	1.04665	0.705381	0.69098	0.686145	0.652443	0.631882	0.72706	0.628825	0.621176	0.604274	1.05831	1.33832	0.619684
gta	Val	0.402675	0.430374	0.224996	0.450069	0.58162	0.243122	0.375683	0.566639	0.363263	0.333037	0.546299	0.293507	0.38204	0.359618	0.437877	0.456791	0.420946	0.313816	0.355241	0.355108	0.338934	0.357998	0.390811	0.345427	0.299499	0.208891	0.412271	0.626722	0.349594
gtc	Val	1.02863	0.998891	1.04742	0.998069	0.719356	0.982844	0.932269	0.891137	0.892041	1.04386	0.914044	0.97677	0.940117	1.11718	0.999338	1.01347	0.987718	1.04168	1.12035	1.11286	0.965624	0.944747	0.951476	0.952069	0.989527	1.04952	0.997481	0.903462	0.94488
gtg	Val	1.86359	1.87035	2.26929	1.83929	1.91461	2.23696	2.09287	1.6925	2.00055	1.88413	1.69779	2.18172	2.02816	1.98413	1.86019	1.84828	1.86532	2.13427	1.98919	1.98959	2.10563	2.08602	2.04605	2.09987	2.12487	2.20722	1.87456	1.5044	2.09836
gtt	Val	0.705111	0.700387	0.4583	0.712571	0.784417	0.537073	0.599175	0.849722	0.744142	0.738975	0.841871	0.548	0.649682	0.539064	0.702595	0.693475	0.726021	0.510227	0.535228	0.542443	0.589816	0.611232	0.611662	0.602636	0.580111	0.534373	0.715687	0.975193	0.607166

## Sheet: Corr_Ana
codon		gca	gcc	gcg	gct	aga	agg	cga	cgc	cgg	cgt	aac	aat	gac	gat	tgc	tgt	caa	cag	gaa	gag	gga	ggc	ggg	ggt	cac	cat	ata	atc	att	cta	ctc	ctg	ctt	tta	ttg	aaa	aag	atg	ttc	ttt	cca	ccc	ccg	cct	agc	agt	tca	tcc
Amino Acid	Subgenus	Ala	Ala	Ala	Ala	Arg	Arg	Arg	Arg	Arg	Arg	Asn	Asn	Asp	Asp	Cys	Cys	Gln	Gln	Glu	Glu	Gly	Gly	Gly	Gly	His	His	Ile	Ile	Ile	Leu	Leu	Leu	Leu	Leu	Leu	Lys	Lys	Met	Phe	Phe	Pro	Pro	Pro	Pro	Ser	Ser	Ser	Ser
ana_mean	Sophophora	0.535272	2.03745	0.628335	0.798946	0.447346	0.653335	0.864049	1.95364	1.15322	0.928409	1.2603	0.739705	1.07639	0.92361	1.42363	0.576373	0.540445	1.45956	0.61939	1.38061	1.15936	1.70229	0.423312	0.71503	1.29501	0.704989	0.512412	1.53264	0.954944	0.467762	1.03164	2.68679	0.573023	0.235613	1.00517	0.573793	1.42621	1	1.31768	0.682315	0.83402	1.48958	1.11062	0.56578	1.4968	0.769364	0.432942	1.66916
ari_mean	Drosophila	0.84163	1.53965	0.827679	0.791037	0.389423	0.327242	0.79332	2.5173	0.641782	1.33094	0.910381	1.08962	0.871168	1.12883	1.38849	0.611511	0.689696	1.3103	0.655467	1.34453	0.615594	2.37963	0.255533	0.749242	1.03633	0.963672	0.794548	1.13058	1.07487	0.590101	0.934537	2.51315	0.421893	0.382512	1.15781	0.712532	1.28747	1	1.13622	0.863782	1.07293	1.34143	1.10634	0.479298	1.84988	0.698581	0.653385	1.11031
bia_mean	Sophophora	0.396764	2.28147	0.78454	0.537225	0.347873	0.77149	0.657166	2.41687	1.17238	0.634222	1.37699	0.623011	1.20326	0.796735	1.5922	0.407804	0.386894	1.61311	0.399894	1.60011	0.891474	2.13195	0.395004	0.581572	1.44327	0.556734	0.457132	1.8075	0.73537	0.300787	1.1077	3.42971	0.338306	0.122192	0.701309	0.396141	1.60386	1	1.50864	0.491363	0.57161	1.86119	1.21918	0.34802	1.7435	0.632456	0.285821	1.79416
bip_mean	Sophophora	0.538394	2.03158	0.601195	0.828833	0.481256	0.660926	0.894246	1.94187	1.05151	0.970199	1.26153	0.738467	1.05495	0.945046	1.41592	0.58408	0.568342	1.43166	0.646407	1.35359	1.16913	1.67032	0.388902	0.771649	1.27301	0.72699	0.527838	1.46637	1.00579	0.473713	0.983253	2.60843	0.647062	0.241253	1.04629	0.593181	1.40682	1	1.25345	0.746555	0.822911	1.51247	1.06859	0.596022	1.47296	0.799585	0.450122	1.6196
bus_mean	Dorsilopha	0.923483	1.24377	0.852651	0.980099	0.425177	0.214962	0.542854	2.696	0.323789	1.79722	0.804883	1.19512	0.71289	1.28711	1.26161	0.738393	0.814317	1.18568	0.702358	1.29764	0.682853	2.22874	0.181091	0.907314	0.821216	1.17878	1.07323	0.692255	1.23452	0.67906	0.692121	2.23779	0.575617	0.476411	1.339	0.741489	1.25851	1	0.792677	1.20732	1.25135	1.20558	0.873426	0.669642	1.91036	0.819663	0.771991	0.983072
ele_mean	Sophophora	0.452534	2.21639	0.758648	0.57243	0.379419	0.67305	0.780402	2.25785	1.12973	0.779545	1.22251	0.777494	1.05979	0.940209	1.49403	0.505967	0.458413	1.54159	0.513777	1.48622	1.00321	1.99877	0.341725	0.656287	1.3074	0.692602	0.449125	1.69073	0.860142	0.343056	1.02678	3.1736	0.367411	0.163025	0.926135	0.510506	1.48949	1	1.39315	0.606848	0.657776	1.719	1.25476	0.368466	1.59221	0.733173	0.337862	1.68333
ere_mean	Sophophora	0.556842	2.00396	0.790565	0.648638	0.422712	0.692779	0.81895	2.22485	1.01203	0.828685	1.21248	0.787523	1.03628	0.963725	1.49574	0.504255	0.501587	1.49841	0.547937	1.45206	1.06522	1.88742	0.328314	0.719042	1.32909	0.670908	0.504511	1.59734	0.898145	0.427491	0.977594	2.94133	0.489476	0.19205	0.972056	0.491441	1.50856	1	1.35337	0.646628	0.767047	1.60585	1.1828	0.444307	1.61693	0.732289	0.400889	1.69283
eug_mean	Sophophora	0.669716	1.82065	0.585578	0.924057	0.592764	0.69752	0.990464	1.71927	0.858277	1.14171	1.05001	0.949994	0.865489	1.13451	1.29471	0.705286	0.657913	1.34209	0.736294	1.26371	1.25338	1.50902	0.325458	0.912141	1.10757	0.892434	0.571284	1.36561	1.0631	0.615681	0.82498	2.24471	0.758606	0.396446	1.15957	0.670315	1.32968	1	1.16868	0.83132	0.970928	1.38788	0.957297	0.683899	1.36153	0.915357	0.58439	1.44276
fic_mean	Sophophora	0.541529	1.97692	0.757026	0.72452	0.482895	0.698457	0.884217	2.06291	1.02928	0.842245	1.26926	0.730738	1.04798	0.952017	1.45407	0.545929	0.547676	1.45232	0.618138	1.38186	1.19098	1.70464	0.373944	0.730432	1.34461	0.655389	0.48019	1.59004	0.929771	0.421646	0.980656	2.67804	0.60512	0.249174	1.06537	0.556037	1.44396	1	1.29188	0.708121	0.760532	1.54703	1.17839	0.514042	1.49869	0.798646	0.42999	1.61053
gri_mean	Drosophila	0.90456	1.54208	0.832549	0.720809	0.357878	0.316537	0.773929	2.40374	0.633752	1.51417	0.809268	1.19073	0.684835	1.31517	1.29266	0.707342	0.717836	1.28216	0.649456	1.35054	0.592642	2.22332	0.275928	0.908115	0.946908	1.05309	0.691146	1.11507	1.19378	0.465478	1.0172	2.44292	0.42457	0.322153	1.32768	0.755329	1.24467	1	1.03454	0.965463	1.12009	1.36154	1.1819	0.336463	1.69413	0.831685	0.657806	1.10722
hyd_mean	Drosophila	0.946491	1.3784	0.769492	0.905616	0.398344	0.304243	0.840115	2.34841	0.521378	1.58751	0.85422	1.14578	0.786488	1.21351	1.30002	0.699981	0.795102	1.2049	0.761633	1.23837	0.667759	2.23615	0.244578	0.851515	0.906215	1.09378	0.870058	1.00471	1.12523	0.674097	0.830016	2.14113	0.561301	0.4831	1.31035	0.79731	1.20269	1	1.0055	0.9945	1.20374	1.21541	1.01646	0.564392	1.7512	0.792934	0.755483	1.03074
kik_mean	Sophophora	0.450004	2.17593	0.72845	0.645618	0.335606	0.638872	0.686639	2.34565	1.13084	0.862388	1.21128	0.788725	1.078	0.921998	1.51253	0.487465	0.422267	1.57773	0.437872	1.56213	0.857348	2.12854	0.327753	0.686355	1.28673	0.713273	0.52409	1.58372	0.892188	0.409744	1.06288	3.14063	0.412588	0.144961	0.829193	0.390663	1.60934	1	1.27247	0.727533	0.61811	1.69364	1.27343	0.414829	1.76068	0.636663	0.338144	1.62399
mel_mean	Sophophora	0.580014	1.98517	0.762768	0.67205	0.454801	0.632628	0.874211	2.17856	0.957364	0.902432	1.17992	0.820083	0.9973	1.0027	1.48566	0.514341	0.521971	1.47803	0.568003	1.432	1.0539	1.85427	0.292772	0.799066	1.27029	0.729708	0.523656	1.55854	0.917799	0.491697	0.939659	2.85291	0.514596	0.204729	0.996412	0.521021	1.47898	1	1.33103	0.668965	0.800939	1.5668	1.2132	0.419057	1.5538	0.768302	0.430611	1.624
mir_mean	Sophophora	0.582954	2.09187	0.701766	0.62341	0.372724	0.478375	0.663736	2.44905	0.961365	1.07475	1.17847	0.821528	1.0814	0.918601	1.46437	0.53563	0.483305	1.5167	0.509409	1.49059	0.823657	2.08249	0.450887	0.642966	1.24204	0.75796	0.619477	1.44265	0.937876	0.427059	1.1598	2.9268	0.404258	0.17153	0.910549	0.524064	1.47594	1	1.3038	0.696195	0.8398	1.63577	1.09641	0.428015	1.72149	0.646483	0.430358	1.46378
moj_mean	Drosophila	0.838009	1.53956	0.829635	0.792792	0.368632	0.334273	0.799883	2.50987	0.640373	1.34697	0.904538	1.09546	0.864024	1.13598	1.38602	0.613978	0.696486	1.30351	0.654235	1.34577	0.619826	2.38601	0.244915	0.749251	1.03567	0.964327	0.791485	1.12812	1.08039	0.587432	0.941881	2.51579	0.424255	0.383165	1.14748	0.709979	1.29002	1	1.13907	0.860934	1.08349	1.34203	1.10169	0.472786	1.83551	0.711374	0.652104	1.11639
nav_mean	Drosophila	0.838622	1.52604	0.846977	0.794356	0.393621	0.34419	0.772548	2.50089	0.651017	1.3648	0.913456	1.08654	0.876891	1.12311	1.39503	0.604966	0.708411	1.29159	0.65309	1.34691	0.632981	2.35606	0.254612	0.765352	1.03118	0.968824	0.808146	1.13409	1.06229	0.576821	0.923923	2.4996	0.454727	0.387775	1.17563	0.715184	1.28482	1	1.13905	0.860954	1.06797	1.34001	1.12438	0.479669	1.82632	0.72697	0.643728	1.11258
nov_mean	Drosophila	0.779125	1.63991	0.937661	0.643302	0.33358	0.293559	0.600545	2.79006	0.62848	1.35378	0.905592	1.09441	0.833859	1.16614	1.40489	0.595108	0.669174	1.33083	0.623525	1.37647	0.505384	2.50365	0.251983	0.73898	0.998226	1.00177	0.872622	1.02614	1.10124	0.54318	0.852192	2.70595	0.470478	0.317976	1.11022	0.721922	1.27808	1	0.999679	1.00032	0.950082	1.39855	1.25176	0.399604	1.96956	0.643136	0.604619	1.10459
obs_mean	Sophophora	0.597064	2.06898	0.735324	0.598632	0.358813	0.467385	0.636739	2.57321	0.913464	1.05039	1.14774	0.852259	1.0595	0.9405	1.48642	0.513576	0.460723	1.53928	0.471328	1.52867	0.743633	2.24395	0.383767	0.628651	1.22368	0.776324	0.627123	1.4185	0.95438	0.36476	1.11494	3.15197	0.348341	0.14158	0.878407	0.495989	1.50401	1	1.31926	0.680741	0.867635	1.66603	1.12179	0.344551	1.78899	0.637971	0.419913	1.43246
per_mean	Sophophora	0.585256	2.09444	0.691091	0.629209	0.368544	0.480197	0.677248	2.44387	0.970301	1.05984	1.17871	0.821288	1.0816	0.918403	1.47016	0.529838	0.485967	1.51403	0.504896	1.4951	0.83898	2.07517	0.443784	0.642061	1.24141	0.758593	0.60981	1.44198	0.94821	0.433125	1.15807	2.93214	0.403241	0.169685	0.903734	0.520577	1.47942	1	1.30651	0.693487	0.826972	1.63223	1.09802	0.442779	1.71687	0.646618	0.431032	1.46313
pse_mean	Sophophora	0.582469	2.0911	0.691922	0.634505	0.37289	0.488877	0.680134	2.42242	0.966991	1.06869	1.17806	0.821944	1.08078	0.919221	1.4645	0.535502	0.487354	1.51265	0.508676	1.49132	0.840037	2.08184	0.438407	0.639711	1.23043	0.769571	0.611512	1.44335	0.945139	0.42904	1.1612	2.91538	0.411449	0.17404	0.908891	0.526373	1.47363	1	1.30234	0.697663	0.827609	1.63594	1.10208	0.434377	1.71225	0.652008	0.427504	1.46465
rho_mean	Sophophora	0.499265	2.11084	0.742452	0.647447	0.428766	0.691867	0.82279	2.11224	1.12024	0.824093	1.19701	0.802987	1.02608	0.973919	1.46427	0.535733	0.508102	1.4919	0.566611	1.43339	1.10445	1.82316	0.380926	0.691471	1.33475	0.665247	0.485903	1.64207	0.87203	0.425517	1.00133	2.91249	0.484804	0.228756	0.947101	0.537533	1.46247	1	1.37826	0.621742	0.699234	1.6442	1.16264	0.493927	1.52516	0.777006	0.392495	1.65909
sec_mean	Sophophora	0.547795	2.00538	0.783774	0.663049	0.441119	0.664594	0.852154	2.20887	0.974387	0.858878	1.21084	0.789155	1.0241	0.975897	1.50202	0.497978	0.506943	1.49306	0.545642	1.45436	1.05705	1.89207	0.310192	0.740689	1.2941	0.705898	0.517103	1.60374	0.87916	0.437018	0.961556	2.9554	0.489493	0.194441	0.962096	0.509076	1.49092	1	1.36596	0.634044	0.769682	1.5827	1.23325	0.414364	1.56868	0.750885	0.419412	1.64831
ser_mean	Sophophora	0.518377	2.03474	0.699367	0.747512	0.363249	0.643179	0.771863	2.10158	1.06479	1.05533	1.13878	0.861223	1.00869	0.991313	1.42351	0.57649	0.483482	1.51652	0.518445	1.48155	0.939911	1.89979	0.346671	0.813631	1.21727	0.782726	0.518308	1.48602	0.995675	0.492945	1.03171	2.88766	0.495884	0.19706	0.894736	0.458065	1.54193	1	1.26098	0.739017	0.742376	1.55957	1.21028	0.48778	1.63861	0.727297	0.439119	1.53943
sim_mean	Sophophora	0.54301	2.01095	0.795659	0.650385	0.434587	0.662579	0.840552	2.23424	0.971032	0.857006	1.21194	0.788055	1.02617	0.973826	1.51285	0.487152	0.497903	1.5021	0.541489	1.45851	1.04125	1.90746	0.311871	0.739419	1.29147	0.708533	0.504024	1.61922	0.876753	0.425814	0.974618	2.98419	0.473001	0.190357	0.952016	0.493398	1.5066	1	1.3743	0.625699	0.765696	1.5938	1.23174	0.408762	1.5836	0.744729	0.409189	1.65295
suz_mean	Sophophora	0.460833	2.20885	0.707161	0.617154	0.404902	0.755995	0.773982	2.12411	1.12177	0.810244	1.24918	0.747808	1.02458	0.972393	1.48848	0.508346	0.47474	1.52226	0.503272	1.49372	1.0668	1.86655	0.374569	0.686085	1.32934	0.667587	0.474682	1.67791	0.842893	0.401257	1.04903	3.03237	0.447165	0.182433	0.878768	0.474383	1.52262	1	1.38403	0.612955	0.681619	1.77035	1.10942	0.432596	1.57342	0.73377	0.367701	1.7544
tak_mean	Sophophora	0.37134	2.28519	0.80914	0.534328	0.345343	0.723937	0.696124	2.40746	1.15232	0.674811	1.21684	0.78316	1.03378	0.966224	1.57077	0.429229	0.393672	1.60633	0.455916	1.54408	0.990881	2.07856	0.349606	0.580955	1.35931	0.640688	0.419506	1.75471	0.825786	0.312989	1.12283	3.29555	0.310867	0.146836	0.81093	0.423821	1.57618	1	1.45164	0.54836	0.530142	1.83159	1.29509	0.343173	1.6531	0.669422	0.256504	1.75176
vir_mean	Drosophila	0.790827	1.6316	0.925447	0.652131	0.333772	0.288935	0.604355	2.75755	0.640524	1.37487	0.89739	1.10261	0.821768	1.17823	1.40439	0.595613	0.68163	1.31837	0.628262	1.37174	0.514306	2.45602	0.256724	0.772947	0.98739	1.01261	0.868242	1.01524	1.11652	0.543596	0.84937	2.67792	0.479555	0.324654	1.1249	0.734693	1.26531	1	0.982231	1.01777	0.965651	1.38187	1.26803	0.384452	1.95948	0.647007	0.611333	1.12795
wil_mean	Sophophora	0.835399	1.6969	0.389177	1.08343	0.626101	0.372378	0.916717	1.51721	0.588878	2.00643	0.582985	1.41701	0.56564	1.43436	1.05251	0.947487	1.02715	0.972851	0.951004	1.049	1.01782	1.5185	0.247817	1.22787	0.633488	1.36651	0.861975	0.813081	1.32946	0.752234	0.682875	1.45269	0.71414	0.6657	1.74849	0.998248	1.00175	1	0.925168	1.07483	1.31741	1.28246	0.721585	0.690597	1.0981	1.15439	0.93956	1.11904
yak_mean	Sophophora	0.561765	2.00843	0.775047	0.654761	0.434542	0.66021	0.874333	2.19848	0.969339	0.863102	1.2188	0.781197	1.02987	0.970126	1.49504	0.504964	0.508152	1.49185	0.550432	1.44957	1.04172	1.92032	0.30416	0.733803	1.3298	0.670204	0.511382	1.57473	0.913889	0.420007	0.959004	2.96231	0.49939	0.199008	0.960284	0.492828	1.50717	1	1.32938	0.67062	0.805552	1.60856	1.15508	0.430805	1.59611	0.737557	0.405643	1.68234
[truncated: 16 more columns]
